# Supplementary material
Source: Springer Nature journal article supplement (https://www.springermedizin.de/resource/supplementary/12889_2010_2652_MOESM1_ESM.pdf/9486890)
Supplement: MOESM1 [file 9486890]

## The initial programme theory

What do the designers expect to be done?

*Initial action model*

How do the programme designers expect the intervention to work?

*Initial change model*

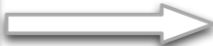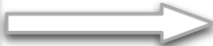

## The refined programme theory

What was actually done and to which effect?

*Refined action model*

How did the actual intervention work?

*Refined change model*
